# Supplementary material for: Hierarchical hollow, sea-urchin-like and porous Ni0.5Co0.5Se2 as advanced battery material for hybrid supercapacitors
Source: Royal Society of Chemistry journal article supplement (doi:10.1039/c8ta05037f), 2018-01-01
Supplement: c8ta05037f1.pdf [file c8ta05037f1.pdf]

## Electronic Supplementary Information

### Hierarchical hollow, sea-urchin-like and porous $\text{Ni}_{0.5}\text{Co}_{0.5}\text{Se}_2$ as advanced battery material for hybrid supercapacitors

Xinxin Song, Chenghao Huang, Yanliang Qin, Hongliang Li,\* and Hai Chao Chen\*

*Institute of Materials for Energy and Environment, College of Materials Science and Engineering, Qingdao University, Qingdao 266071, China*

\*Corresponding authors. E-mail: chenhchust@126.com, chenhc@qdu.edu.cn (H. C. Chen),  
lhl@qdu.edu.cn (H. Li)

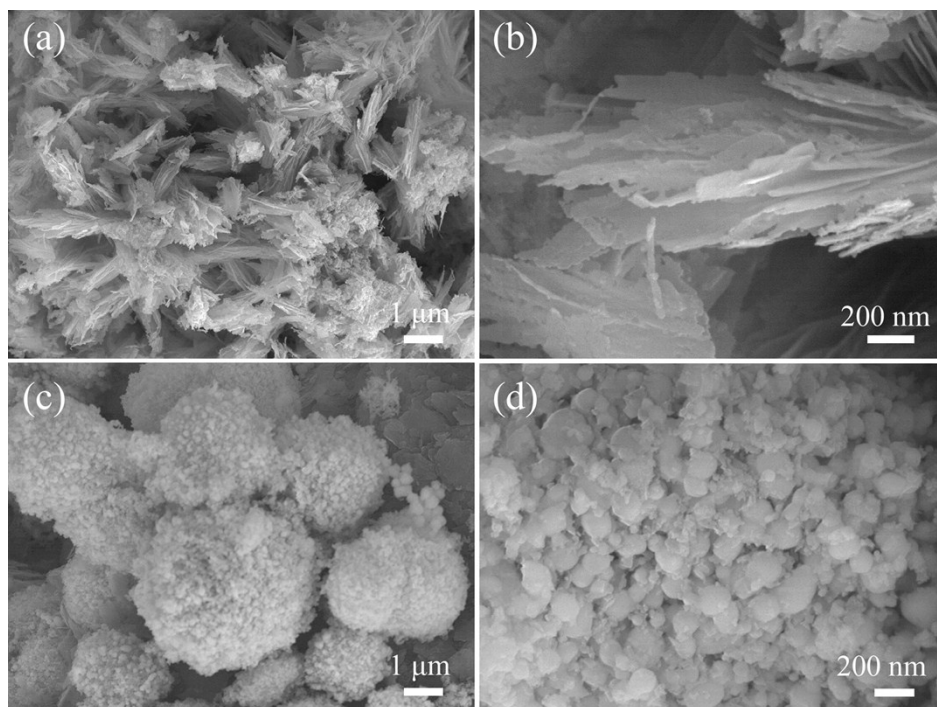

**Fig. S1** SEM images of the (a,b)  $\text{CoSe}_2$  and (c,d)  $\text{NiSe}_2$ .

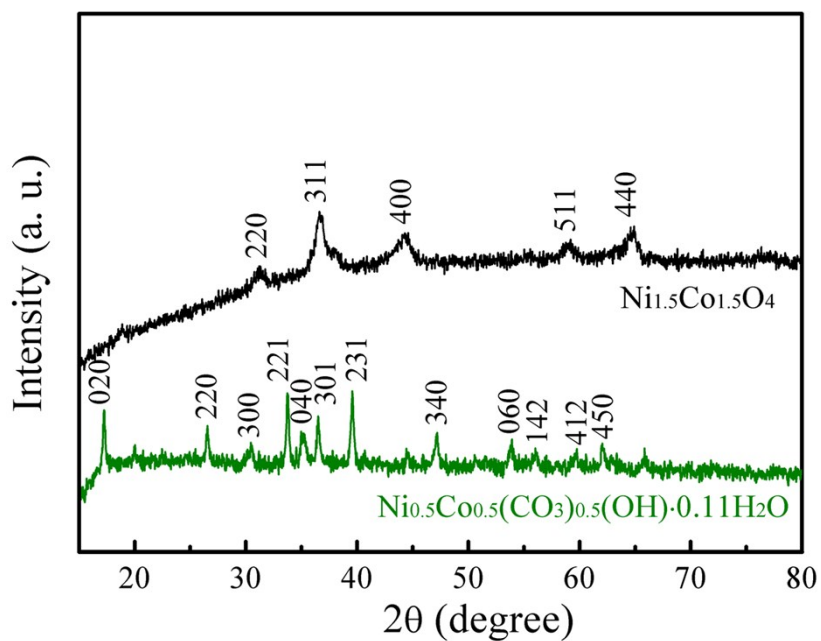

**Fig. S2** XRD patterns of the  $\text{Ni}_{0.5}\text{Co}_{0.5}(\text{CO}_3)_{0.5}\text{OH}$  precursor and the  $\text{Ni}_{1.5}\text{Co}_{1.5}\text{O}_4$ .

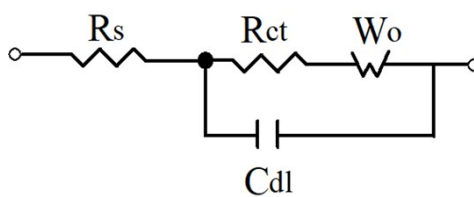

**Fig. S3** The equivalent circuit model used to fit the EIS spectra, where  $R_s$  is the bulk solution resistance,  $R_{ct}$  is the charge-transfer resistance,  $C_{dl}$  is the double-layer capacitance, and  $W_o$  is the Warburg resistance.

**Table S1.** Comparison of the capacitive performance of the typical Ni<sub>0.5</sub>Co<sub>0.5</sub>Se<sub>2</sub> and other representative selenides electrode materials reported previously

| Electrode materials                                   | Morphology                                                           | Specific capacity                                     | Specific current      | Ref.      |
|-------------------------------------------------------|----------------------------------------------------------------------|-------------------------------------------------------|-----------------------|-----------|
| Ni <sub>0.5</sub> Co <sub>0.5</sub> Se <sub>2</sub>   | Hollow sea-urchin-like structure                                     | 524 C g <sup>-1</sup> (1007 F g <sup>-1</sup> )       | 1 A g <sup>-1</sup>   | This work |
| Ni <sub>0.5</sub> Co <sub>0.5</sub> Se                | Nanoparticles                                                        | 449 C g <sup>-1</sup> (863.46 F g <sup>-1</sup> )     | 1 A g <sup>-1</sup>   | 1         |
| Ni-Co-Se-3-3                                          | Hollow nanoparticles                                                 | 420.4 C g <sup>-1</sup> (800.76 F g <sup>-1</sup> )   | 1 A g <sup>-1</sup>   | 2         |
| NiCoSe <sub>2</sub>                                   | Hollow sub-microspheres                                              | 450 C g <sup>-1</sup> (750 F g <sup>-1</sup> )        | 3 A g <sup>-1</sup>   | 3         |
| Ni <sub>0.34</sub> Co <sub>0.66</sub> Se <sub>2</sub> | Ni <sub>0.34</sub> Co <sub>0.66</sub> Se <sub>2</sub> nanorod arrays | 1.305 C cm <sup>-2</sup> (2.61 F cm <sup>-2</sup> )   | 4 mA cm <sup>-2</sup> | 4         |
| (Ni,Co) <sub>0.85</sub> Se                            | Nanotubes on CFC                                                     | 1.165 C cm <sup>-2</sup> (2.33 F cm <sup>-2</sup> )   | 4 mA cm <sup>-2</sup> | 5         |
| Ni <sub>3</sub> Se <sub>2</sub>                       | Cauliflower-like nanostructures on fabric                            | 430.56 C g <sup>-1</sup> (956.8 F g <sup>-1</sup> )   | 2 A g <sup>-1</sup>   | 6         |
| NiSe@MoSe <sub>2</sub>                                | Uniform vertical nanosheet arrays                                    | 461.52 C g <sup>-1</sup> (769.2 F g <sup>-1</sup> )   | 1 A g <sup>-1</sup>   | 7         |
| Ni <sub>0.85</sub> Se@MoSe <sub>2</sub>               | Ultrathin nanosheet arrays                                           | 387 C g <sup>-1</sup> (774 F g <sup>-1</sup> )        | 1 A g <sup>-1</sup>   | 8         |
| NiSe <sub>2</sub>                                     | Cube-like single crystals                                            | 417.6 C g <sup>-1</sup> (1044 F g <sup>-1</sup> )     | 3 A g <sup>-1</sup>   | 9         |
| CoSe <sub>2</sub>                                     | 3D hierarchical architectures                                        | 0.2656 C cm <sup>-2</sup> (0.332 F cm <sup>-2</sup> ) | 1 mA cm <sup>-2</sup> | 10        |
| CoSe <sub>2</sub>                                     | Porous nanosheet                                                     | 356.95 C g <sup>-1</sup> (713.9 F g <sup>-1</sup> )   | 1 mA cm <sup>-2</sup> | 11        |
| Co <sub>0.85</sub> Se                                 | Petal-like nanosheets                                                | 176.4 C g <sup>-1</sup> (294 F g <sup>-1</sup> )      | 0.5 A g <sup>-1</sup> | 12        |
| Co <sub>0.85</sub> Se                                 | Hollow nanotubes                                                     | 119 C g <sup>-1</sup> (238 F g <sup>-1</sup> )        | 1 A g <sup>-1</sup>   | 13        |
| CuSe                                                  | 2D nanosheets film                                                   | 125.4 C g <sup>-1</sup> (209 F g <sup>-1</sup> )      | 0.2 A g <sup>-1</sup> | 14        |
| FeSe <sub>2</sub>                                     | Hierarchical snowflake structure                                     | 304 C g <sup>-1</sup> (304 F g <sup>-1</sup> )        | 0.5 A g <sup>-1</sup> | 15        |
| GeSe <sub>2</sub>                                     | 3D hierarchical nanostructures                                       | 180 C g <sup>-1</sup> (300 F g <sup>-1</sup> )        | 1 A g <sup>-1</sup>   | 16        |
| SnSe                                                  | 2D nanostructures                                                    | 98.04 C g <sup>-1</sup> (228 F g <sup>-1</sup> )      | 0.5 A g <sup>-1</sup> | 17        |

## Reference

- 1 H. Chen, S. Chen, M. Fan, C. Li, D. Chen, G. Tian and K. Shu, *J. Mater. Chem. A*, 2015, **3**, 23653–23659.
- 2 H. Chen, M. Fan, C. Li, G. Tian, C. Lv, D. Chen, K. Shu and J. Jiang, *J. Power Sources*, 2016, **329**, 314–322.
- 3 L. Hou, Y. Shi, C. Wu, Y. Zhang, Y. Ma, X. Sun, J. Sun, X. Zhang and C. Yuan, *Adv. Funct. Mater.*, 2018, **28**, 1705921.
- 4 P. Xu, W. Zeng, S. Luo, C. Ling, J. Xiao, A. Zhou, Y. Sun and K. Liao, *Electrochim. Acta*, 2017, **241**, 41–49.
- 5 C. Xia, Q. Jiang, C. Zhao, P. M. Beaujuge and H. N. Alshareef, *Nano Energy*, 2016, **24**, 78–86.
- 6 G. Nagaraju, S. M. Cha, S. C. Sekhar and J. S. Yu, *Adv. Energy Mater.*, 2017, **7**, 1601362.
- 7 H. Peng, J. Zhou, K. Sun, G. Ma, Z. Zhang, E. Feng and Z. Lei, *ACS Sustain. Chem. Eng.*, 2017, **5**, 5951–5963.
- 8 H. Peng, C. Wei, K. Wang, T. Meng, G. Ma, Z. Lei and X. Gong, *ACS Appl. Mater. Interfaces*, 2017, **9**, 17067–17075.

- 9 S. Wang, W. Li, L. Xin, M. Wu, Y. Long, H. Huang and X. Lou, *Chem. Eng. J.*, 2017, **330**, 1334–1341.
- 10 N. Yu, M.-Q. Zhu and D. Chen, *J. Mater. Chem. A*, 2015, **3**, 7910–7918.
- 11 T. Chen, S. Li, J. Wen, P. Gui and G. Fang, *ACS Appl. Mater. Interfaces*, 2017, **9**, 35927–35935.
- 12 H. Peng, G. Ma, K. Sun, Z. Zhang, J. Li, X. Zhou and Z. Lei, *J. Power Sources*, 2015, **297**, 351–358.
- 13 Z. Wang, Q. Sha, F. Zhang, J. Pu and W. Zhang, *CrystEngComm*, 2013, **15**, 5928–5934.
- 14 L. Li, J. Gong, C. Liu, Y. Tian, M. Han, Q. Wang, X. Hong, Q. Ding, W. Zhu and J. Bao, *ACS Omega*, 2017, **2**, 1089–1096.
- 15 C. Ji, F. Liu, L. Xu and S. Yang, *J. Mater. Chem. A*, 2017, **5**, 5568–5576.
- 16 X. Wang, B. Liu, Q. Wang, W. Song, X. Hou, D. Chen, Y. Cheng and G. Shen, *Adv. Mater.*, 2013, **25**, 1479–1486.
- 17 C. Zhang, H. Yin, M. Han, Z. Dai, H. Pang, Y. Zheng, Y. Q. Lan, J. Bao and J. Zhu, *ACS Nano*, 2014, **8**, 3761–3770.
